# Supplementary material for: Promoting OH* adsorption by defect engineering of CuO catalysts for selective electro-oxidation of amines to nitriles coupled with hydrogen production
Source: Royal Society of Chemistry journal article supplement (doi:10.1039/d4sc01571a), 2024-01-01
Supplement: d4sc01571a1.pdf [file d4sc01571a1.pdf]

## Supporting Information

### Promoting OH\* adsorption by defect engineering of CuO catalysts for selective electro-oxidation of amines to nitriles coupled with hydrogen production

*Xu Yang, Enhui Wei, Yuan Dong, Yu Fan, Hongtao Gao, Xiliang Luo\* and Wenlong Yang\**

X. Yang, E. H. Wei, Y. Dong, Y. Fan, Prof. H. T. Gao, Prof. X. L. Luo, Prof. W. L. Yang  
Key Laboratory of Optic-electric Sensing and Analytical Chemistry for Life Science, MOE,  
Key Laboratory of Analytical Chemistry for Life Science in Universities of Shandong,  
College of Chemistry and Molecular Engineering,  
Qingdao University of Science and Technology,  
Qingdao 266042, P. R. China

E-mail: [xiliangluo@qust.edu.cn](mailto:xiliangluo@qust.edu.cn); [wlyang@qust.edu.cn](mailto:wlyang@qust.edu.cn)

Supporting information: DFT calculation method and Figures S1-S12.

**Product analysis:** Typically, 50 mL of electrolyte was extracted with 50 mL of ethyl acetate after chronoamperometry measurements to probe the oxidation products of benzylamine and determine the Faradaic efficiencies (FEs) at different potentials. The obtained oxidation products were qualitatively and quantitatively analyzed by gas chromatography-mass spectrometer (GCMS-QP2020) using bromobenzene as an internal standard. Meanwhile, a classic water-gas displacing method was utilized to collect the produced H<sub>2</sub> at cathode, which was qualitatively confirmed by gas chromatography.

The FEs for the generation of benzonitrile and H<sub>2</sub> were determined as follows.

$$\text{FE}_{\text{benzonitrile}}(\%) = \frac{\text{mol of generated benzonitrile}}{\text{total passed charge}/4F} \times 100\%$$
$$\text{FE}_{\text{H}_2}(\%) = \frac{\text{mol of generated hydrogen}}{\text{total passed charge}/2F} \times 100\%$$

Where F is the Faraday constant (96485 C mol<sup>-1</sup>).

**Calculation Method:** Spin-polarized first-principle calculations were performed by the density functional theory (DFT) using the Vienna Ab-initio Simulation Package (VASP) package.<sup>[1]</sup> The generalized gradient approximation (GGA) with the Perdew–Burke–Ernzerhof (PBE) functional were used to describe the electronic exchange and correlation effects.<sup>[2-4]</sup> Uniform G-centered k-points meshes with a resolution of  $2\pi \times 0.05 \text{ \AA}^{-1}$  and Methfessel-Paxton electronic smearing were adopted for the integration in the Brillouin zone for geometric optimization. The simulation was run with a cutoff energy of 520 eV throughout the computations. These settings ensure convergence of the total energies to within 1 meV per atom. Structure relaxation proceeded until all forces on atoms were less than  $10 \text{ meV \AA}^{-1}$  and the total stress tensor was within 0.03 GPa of the target value. The DFT+U approach<sup>[5]</sup> was used to modify the intra-atomic Coulomb interaction among strongly correlated Cu-3d electrons with  $U_{\text{eff}} = 7.14 \text{ eV}$ .<sup>[6]</sup> CuO is a monoclinic structural substance having four Cu and four O atoms in the unit cell that corresponds to the C2/c space group. A supercell of size  $2 \times 2 \times 1$  was chosen ( $\text{Cu}_{16}\text{O}_{16}$ ) to calculate its electronic property, and one O atom was removed in the supercell to investigate the effect of O vacancy on its electronic structure.

The averaged adsorption energy of  $\text{OH}^-$  on  $\text{V}_\text{o}$ -free CuO (111) and  $\text{V}_\text{o}$ -CuO (111) surfaces was calculated by the following equation:

$$\Delta E(\text{ads}) = \{E(\text{total}) - E(\text{surface}) - N * E(\text{OH}^-)\} / N$$

which  $E(\text{total})$  is the energy of  $\text{OH}^-$  adsorbed on  $\text{V}_\text{o}$ -free CuO (111) and  $\text{V}_\text{o}$ -CuO (111) surfaces,  $E(\text{surface})$  is the energy of  $\text{V}_\text{o}$ -free CuO (111) and  $\text{V}_\text{o}$ -CuO (111) surfaces,  $N * E(\text{OH}^-)$  is the energy of free  $\text{OH}^-$ .  $N$  is the number of  $\text{OH}^-$ . The calculated results are listed in Table S1.

The calculated adsorption energy of  $\text{C}_7\text{H}_9\text{N}$  on  $\text{V}_\text{o}$ -free CuO (111) and  $\text{V}_\text{o}$ -CuO (111) surfaces was calculated by the following equation:

$$\Delta E(\text{ads}) = E(\text{total}) - E(\text{surface}) - E(\text{C}_7\text{H}_9\text{N})$$

which  $E(\text{total})$  is the energy of  $\text{C}_7\text{H}_9\text{N}$  adsorbed on  $\text{V}_\text{o}$ -free CuO (111) and  $\text{V}_\text{o}$ -CuO (111) surfaces,  $E(\text{surface})$  is the energy of  $\text{V}_\text{o}$ -free CuO (111) and  $\text{V}_\text{o}$ -CuO (111) surfaces,  $E(\text{C}_7\text{H}_9\text{N})$  is the energy of free  $\text{C}_7\text{H}_9\text{N}$  molecule. The calculated results are listed in Table S2.

The calculated desorption energy of C<sub>7</sub>H<sub>5</sub>N on V<sub>o</sub>-free CuO (111) and V<sub>o</sub>-CuO (111) surfaces was calculated by the following equation:

$$\Delta E(\text{des}) = E(\text{surface}) + E(\text{C}_7\text{H}_5\text{N}) - E(\text{total})$$

which E(total) is the energy of C<sub>7</sub>H<sub>5</sub>N adsorbed on V<sub>o</sub>-free CuO (111) and V<sub>o</sub>-CuO (111) surfaces, E(surface) is the energy of V<sub>o</sub>-free CuO (111) and V<sub>o</sub>-CuO (111) surfaces, E(C<sub>7</sub>H<sub>5</sub>N) is the energy of free C<sub>7</sub>H<sub>5</sub>N molecule. The calculated results are listed in Table S3.

The dehydrogenation process of from C<sub>7</sub>H<sub>9</sub>N to C<sub>7</sub>H<sub>5</sub>N on V<sub>o</sub>-free CuO (111) and V<sub>o</sub>-CuO (111) surfaces can be expressed as follows:

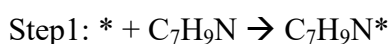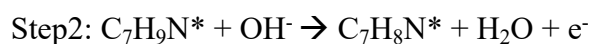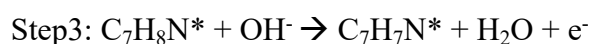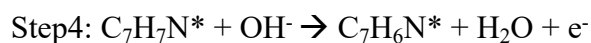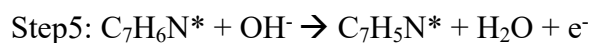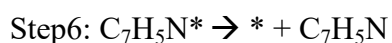

where \* presents the V<sub>o</sub>-free CuO (111) and V<sub>o</sub>-CuO (111) surfaces, and intermediates\* denotes the corresponding absorbed intermediates.

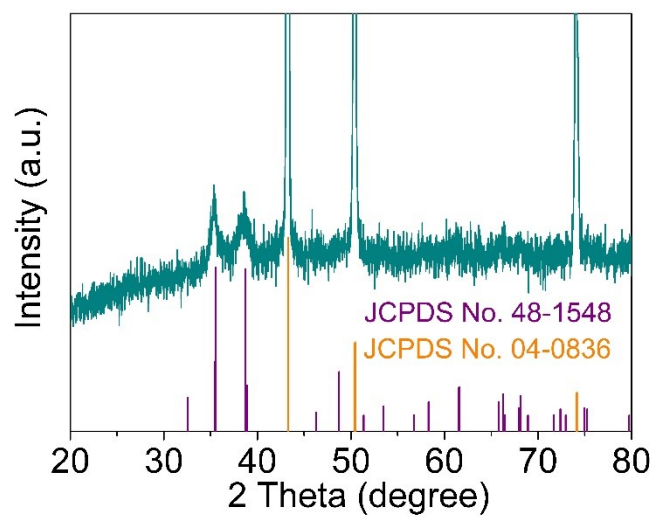

**Figure S1.** XRD pattern of  $V_o$ -rich CuO nanorod arrays on copper foam.

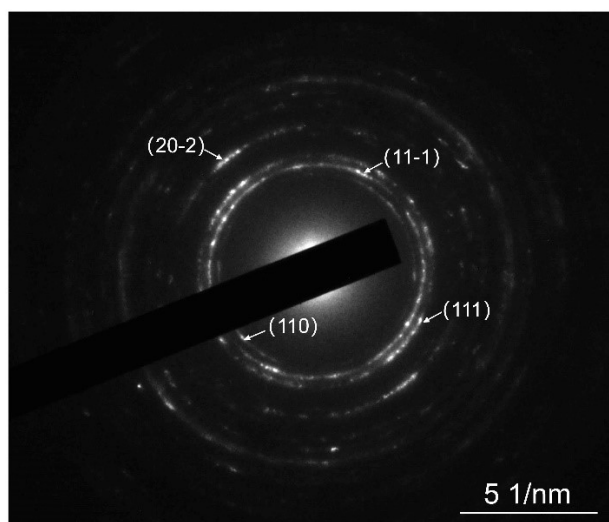

**Figure S2.** SAED pattern of  $V_o$ -rich CuO sample.

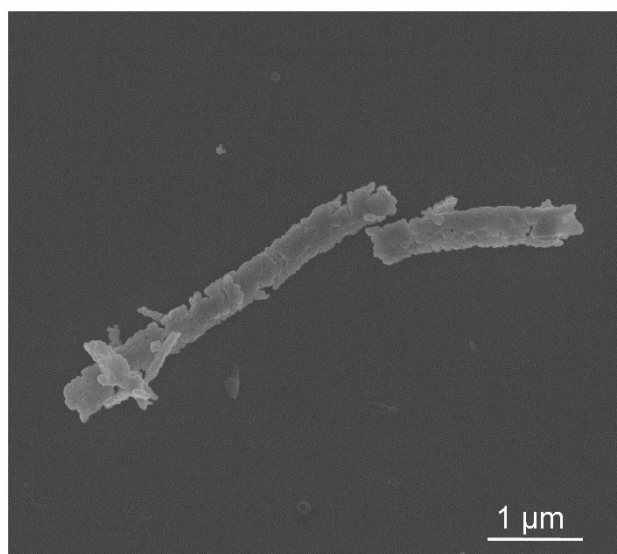

**Figure S3.** SEM image of  $V_o$ -poor CuO sample.

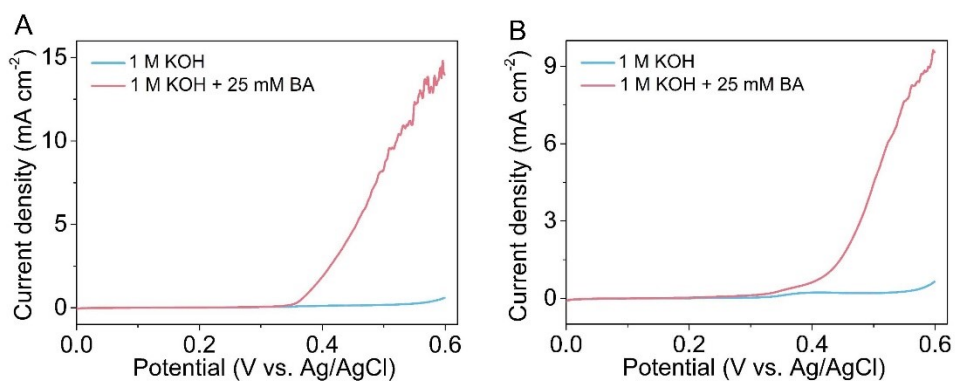

**Figure S4.** LSV curves of  $V_o$ -rich CuO sample (A) and  $V_o$ -poor CuO sample (B) in 1.0 M KOH solution with 25 mM benzylamine at a scan rate of  $5 \text{ mV s}^{-1}$ .

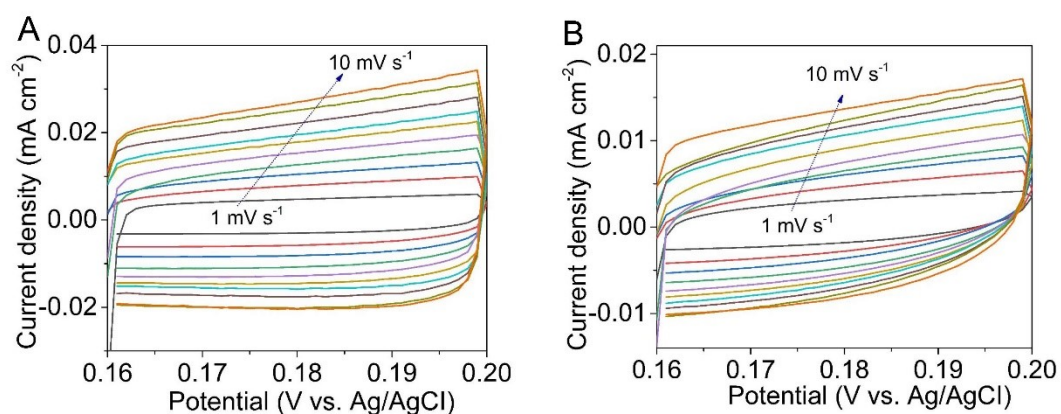

**Figure S5.** CV curves of  $V_o$ -rich CuO sample (A) and  $V_o$ -poor CuO sample (B) in 1.0 M KOH solution at scan rates from 1 to  $10 \text{ mV s}^{-1}$ .

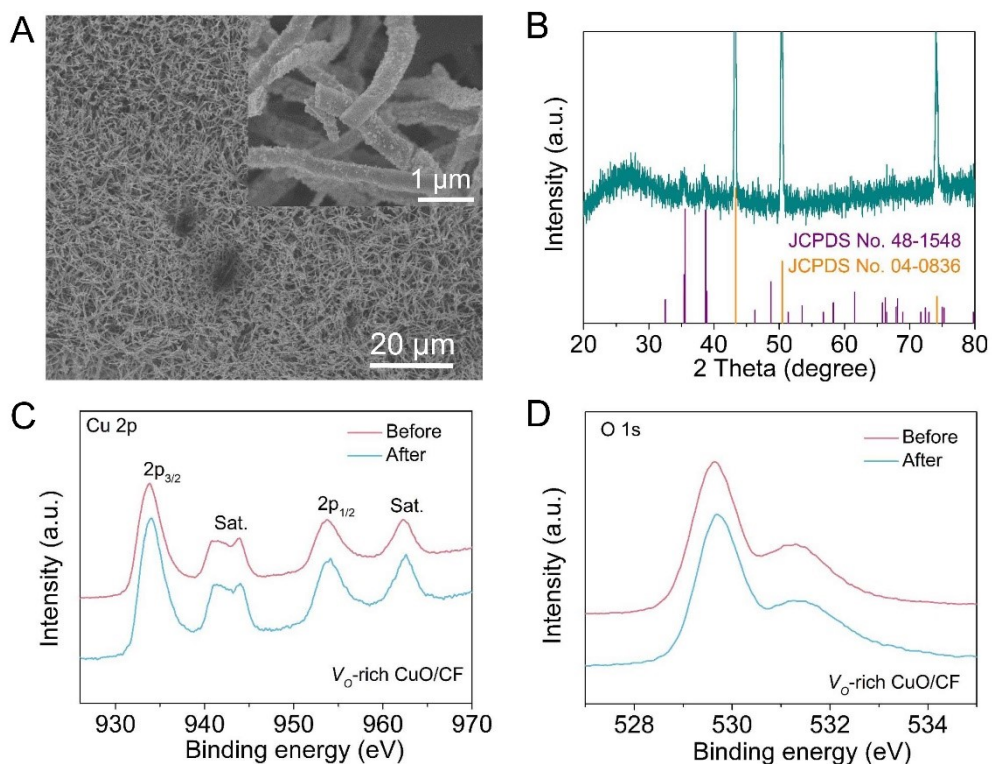

**Figure S6.** (A) SEM image (inset: enlargement), (B) XRD pattern, (C) Cu 2p and (D) O 1s spectra of  $V_o$ -rich CuO/CF after six cyclic tests.

Compared to pristine  $V_o$ -rich CuO/CF, the surface of nanorods becomes rougher after six cyclic tests, which is mainly due to the surface reconstruction to CuOOH phase during the electrochemical process.

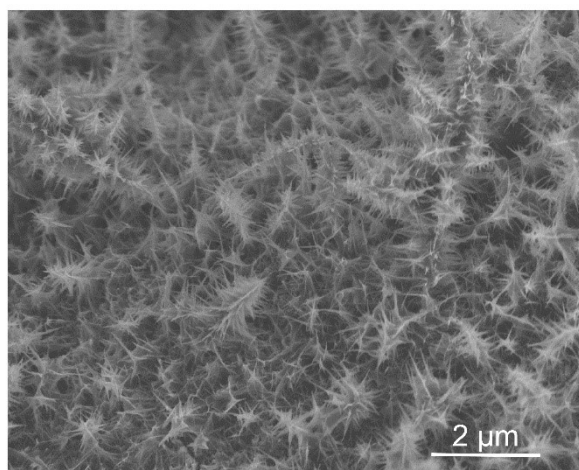

**Figure S7.** SEM image of NiSe nanorod arrays on nickel foam.

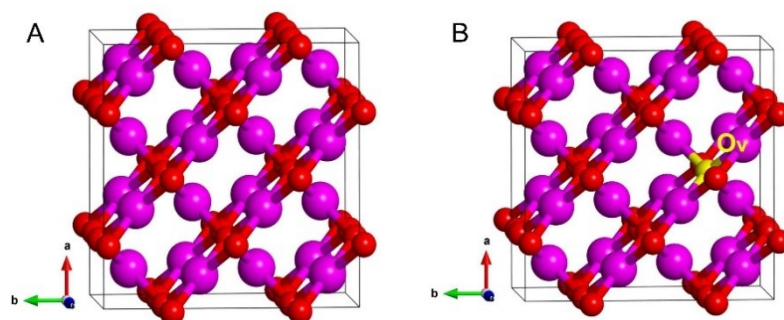

**Figure S8.** The optimized structures of (A)  $V_o$ -free CuO and (B)  $V_o$ -CuO. Cu: purple, O: red. The yellow ball denotes the O vacancy.

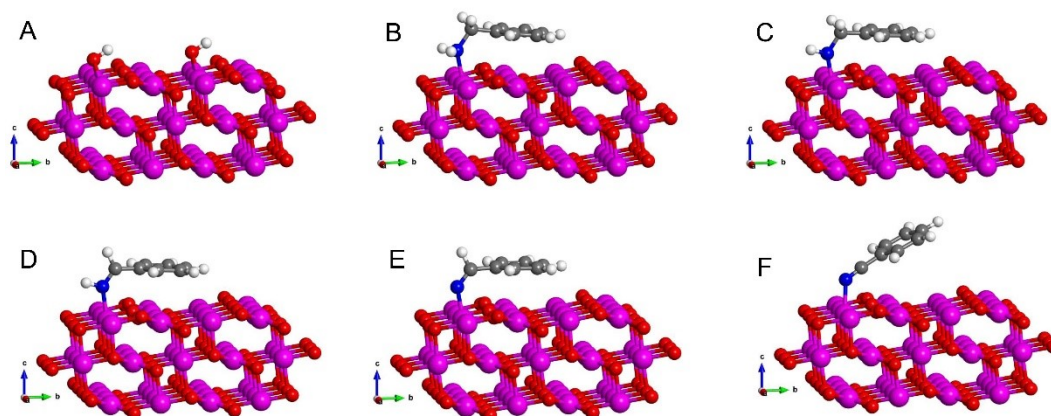

**Figure S9.** The optimized intermediate structures on  $V_o$ -free CuO (111) surface. Cu: purple; O: red; C: black; N: blue; H: white. (A)  $OH^*$ , (B)  $C_7H_9N^*$ , (C)  $C_7H_8N^*$ , (D)  $C_7H_7N^*$ , (E)  $C_7H_6N^*$ , (F)  $C_7H_5N^*$ .

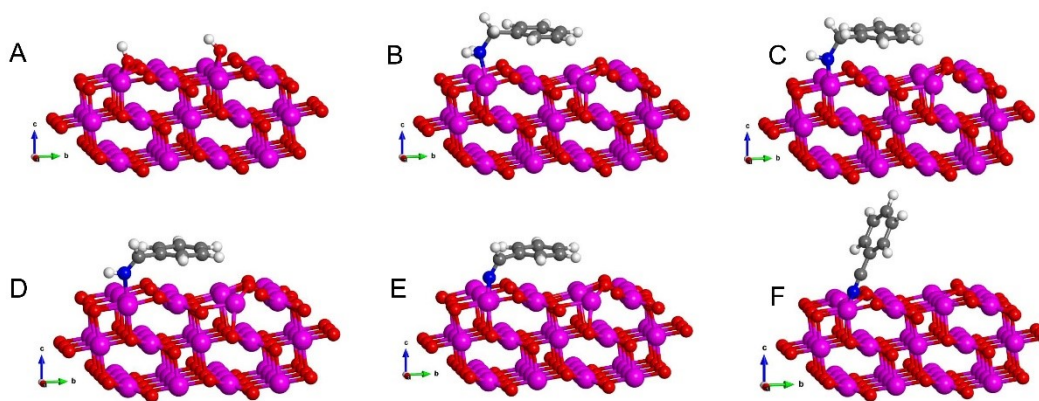

**Figure S10.** The optimized intermediate structures on  $V_o$ -CuO (111) surface. Cu: purple; O: red; C: black; N: blue; H: white. (A)  $OH^*$ , (B)  $C_7H_9N^*$ , (C)  $C_7H_8N^*$ , (D)  $C_7H_7N^*$ , (E)  $C_7H_6N^*$ , (F)  $C_7H_5N^*$ .

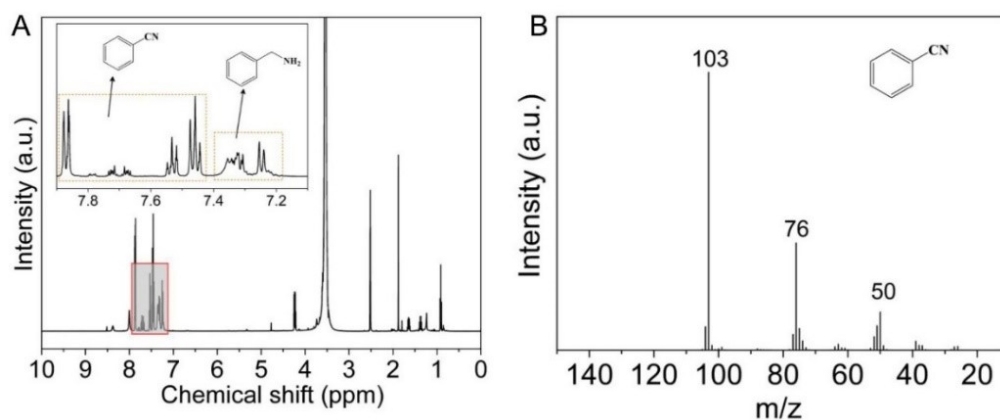

**Figure S11.** (A)  $^1H$  NMR spectra and (B) mass spectra of the collected product after BOR.

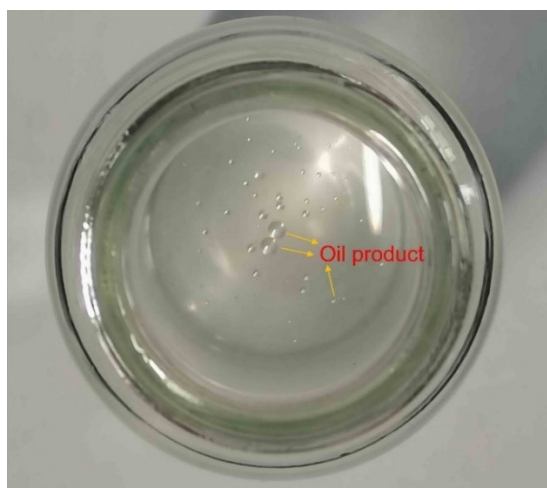

**Figure S12.** The photograph of oil product floating on the electrolyte surface after 40000 s electrolysis in 1 M KOH containing 50 mM BA.

**Table S1.** The averaged adsorption energy of OH<sup>-</sup> on V<sub>o</sub>-free CuO (111) and V<sub>o</sub>-CuO (111) surfaces, unit: eV.

| Species                  | E(total)      | E(surface)    | E(OH <sup>-</sup> ) | N | ΔE(ads)     |
|--------------------------|---------------|---------------|---------------------|---|-------------|
| V <sub>o</sub> -free CuO | -378.52605828 | -357.08872785 | -10.14921985        | 2 | -0.56944536 |
| V <sub>o</sub> -CuO      | -365.32995913 | -343.33997043 | -10.14921985        | 2 | -0.84577450 |

**Table S2** The calculated adsorption energy of C<sub>7</sub>H<sub>9</sub>N on V<sub>o</sub>-free CuO (111) and V<sub>o</sub>-CuO (111) surfaces, unit: eV.

| Species                  | E(total)      | E(surface)    | E(C <sub>7</sub> H <sub>9</sub> N) | ΔE(ads)     |
|--------------------------|---------------|---------------|------------------------------------|-------------|
| V <sub>o</sub> -free CuO | -459.81730963 | -357.08872785 | -101.90313745                      | -0.82544433 |
| V <sub>o</sub> -CuO      | -446.7563077  | -343.33997043 | -101.90313745                      | -1.51319986 |

**Table S3** The calculated desorption energy of C<sub>7</sub>H<sub>5</sub>N on V<sub>o</sub>-free CuO (111) and V<sub>o</sub>-CuO (111) surfaces, unit: eV.

| Species                  | E(total)      | E(surface)    | E(C <sub>7</sub> H <sub>5</sub> N) | ΔE(des)    |
|--------------------------|---------------|---------------|------------------------------------|------------|
| V <sub>o</sub> -free CuO | -445.08694067 | -357.08872785 | -87.55728913                       | 0.44092369 |
| V <sub>o</sub> -CuO      | -431.12937445 | -343.33997043 | -87.55728913                       | 0.23211489 |

**Table S4** The calculated intermediates energies on V<sub>o</sub>-free CuO (111) surface, unit: eV.

|                                  | CuO           |       |       |               |                                   |             |             |
|----------------------------------|---------------|-------|-------|---------------|-----------------------------------|-------------|-------------|
|                                  | E             | ZPE   | TS    | G             |                                   | ΔG          | plot G      |
| surface                          | -357.08872785 | -     | -     | -357.08872785 | *+C <sub>7</sub> H <sub>9</sub> N | 0.00000000  | 0.00000000  |
| C <sub>7</sub> H <sub>9</sub> N* | -463.42630963 | 3.920 | 0.311 | -459.81730963 | C <sub>7</sub> H <sub>9</sub> N*  | -0.82544433 | -0.82544433 |
| C <sub>7</sub> H <sub>8</sub> N* | -458.39911183 | 3.551 | 0.365 | -455.21311183 | C <sub>7</sub> H <sub>8</sub> N*  | 1.77790364  | 0.95245931  |
| C <sub>7</sub> H <sub>7</sub> N* | -455.38679273 | 3.261 | 0.359 | -452.48479273 | C <sub>7</sub> H <sub>7</sub> N*  | -0.09797506 | 0.85448425  |
| C <sub>7</sub> H <sub>6</sub> N* | -450.59509540 | 2.946 | 0.352 | -448.00109540 | C <sub>7</sub> H <sub>6</sub> N*  | 1.65740317  | 2.51188742  |
| C <sub>7</sub> H <sub>5</sub> N* | -447.33494067 | 2.646 | 0.398 | -445.08694067 | C <sub>7</sub> H <sub>5</sub> N*  | 0.08786057  | 2.59974799  |
| H <sub>2</sub> O                 | -14.28351401  | 0.559 | 0.671 | -14.39551401  | *+C <sub>7</sub> H <sub>5</sub> N | 0.44092369  | 3.04067168  |
| OH <sup>-</sup>                  | -11.56921985  |       |       | -11.56921985  |                                   |             |             |
| C <sub>7</sub> H <sub>9</sub> N  | -104.68613745 | 3.878 | 1.095 | -101.90313745 |                                   |             |             |
| C <sub>7</sub> H <sub>5</sub> N  | -89.19028913  | 2.636 | 1.003 | -87.55728913  |                                   |             |             |

**Table S5** The calculated intermediates energies on V<sub>o</sub>-CuO (111) surface, unit: eV.

|                                  | CuO           |       |       |               |                                   |             |                 |
|----------------------------------|---------------|-------|-------|---------------|-----------------------------------|-------------|-----------------|
|                                  | E             | ZPE   | TS    | G             |                                   | ΔG          | plot G          |
| surface                          | -343.33997043 | -     | -     | -343.33997043 | *+C <sub>7</sub> H <sub>9</sub> N | 0.00000000  | 0.00000000      |
| C <sub>7</sub> H <sub>9</sub> N* | -450.32330774 | 3.930 | 0.363 | -450.32330774 | C <sub>7</sub> H <sub>9</sub> N*  | -1.51319986 | -<br>1.51319986 |
| C <sub>7</sub> H <sub>8</sub> N* | -446.05437640 | 3.605 | 0.338 | -446.05437640 | C <sub>7</sub> H <sub>8</sub> N*  | 1.14263718  | -<br>0.37056268 |
| C <sub>7</sub> H <sub>7</sub> N* | -442.26758744 | 3.265 | 0.354 | -442.26758744 | C <sub>7</sub> H <sub>7</sub> N*  | 0.60449480  | 0.23393212      |
| C <sub>7</sub> H <sub>6</sub> N* | -437.71879708 | 2.944 | 0.358 | -437.71879708 | C <sub>7</sub> H <sub>6</sub> N*  | 1.39749620  | 1.63142832      |
| C <sub>7</sub> H <sub>5</sub> N* | -433.36737445 | 2.644 | 0.406 | -433.36737445 | C <sub>7</sub> H <sub>5</sub> N*  | 1.17712847  | 2.80855679      |
| H <sub>2</sub> O                 | -14.28351401  | 0.559 | 0.671 | -14.28351401  | *+C <sub>7</sub> H <sub>5</sub> N | 0.23211489  | 3.04067168      |
| OH <sup>-</sup>                  | -11.56921985  |       |       | -11.56921985  |                                   |             |                 |
| C <sub>7</sub> H <sub>9</sub> N  | -104.68613745 | 3.878 | 1.095 | -104.68613745 |                                   |             |                 |
| C <sub>7</sub> H <sub>5</sub> N  | -89.19028913  | 2.636 | 1.003 | -89.19028913  |                                   |             |                 |



**Table S6.** The data of potentiostatic electrolysis at different potentials.

| Potential (V vs. Ag/AgCl) | electrolyte             | Time (s) | Charge (C) |
|---------------------------|-------------------------|----------|------------|
| 0.35                      | 70 mL, 1 M KOH+25 mM BA | 10000    | 18.1       |
| 0.40                      | 70 mL, 1 M KOH+25 mM BA | 10000    | 89.5       |
| 0.45                      | 70 mL, 1 M KOH+25 mM BA | 10000    | 155.4      |
| 0.50                      | 70 mL, 1 M KOH+25 mM BA | 10000    | 169.1      |
| 0.55                      | 70 mL, 1 M KOH+25 mM BA | 10000    | 183.1      |

**Table S7.** Comparison of the electrocatalytic BOR performance between the V<sub>o</sub>-rich CuO/CF and recently reported Ni-based catalysts.

| Catalyst                                         | Onset potential (V vs. RHE) | FE (%) | Electrolyte         |
|--------------------------------------------------|-----------------------------|--------|---------------------|
| V <sub>o</sub> -rich CuO/CF, this work           | 1.36                        | 93.82  | 1 M KOH + 25 mM BA  |
| Mn- $\alpha$ -Ni(OH) <sub>2</sub> <sup>[7]</sup> | 1.31                        | 96     | 1 M KOH + 25 mM BA  |
| NiSe <sup>[8]</sup>                              | 1.34                        | 99     | 1 M KOH + 25 mM BA  |
| Ni <sub>3</sub> N <sup>[9]</sup>                 | ~1.35                       | ~95    | 1 M KOH + 2 mmol BA |
| W-doped Ni <sub>2</sub> P <sup>[10]</sup>        | ~1.32                       | 95     | 1 M KOH + 25 mM BA  |
| NiFe-MOF/NF <sup>[11]</sup>                      | ~1.30                       | 99     | 1 M KOH + 20 mM BA  |
| NiCoFe-CAT <sup>[12]</sup>                       | 1.29                        | ~87    | 1 M KOH + 10 mM BA  |

**References**

- [1] G. Kresse, J. Furthmüller, *Comput. Mater. Sci.* **1996**, *6*, 15-50.
- [2] J. P. Perdew, K. Burke, M. Ernzerhof, *Phys. Rev. Lett.* **1996**, *77*, 3865–3868.
- [3] P. E. Blöchl, *Phys. Rev. B: Condens. Matter Mater. Phys.* **1994**, *50*, 17953–17979.
- [4] G. Kresse, D. Joubert, *Phys. Rev. B: Condens. Matter Mater. Phys.* **1999**, *59*, 1758.
- [5] V. V. Anisimov, J. Zaanen, O. K. Andersen, *Phys. Rev. B* **1991**, *44*, 943-954.
- [6] M. Jamal, S. S. Nishat, A. Sharif, *Chem. Phys.* **2021**, *545*, 111160.
- [7] Y. X. Sun, H. Shin, F. Y. Wang, B. L. Tian, C. W. Chiang, S. T. Liu, X. S. Li, Y. Q. Wang, L. Y. Tang, W. A. Goddard, M. N. Ding, *J. Am. Chem. Soc.* **2022**, *144*, 15185.
- [8] Y. Huang, X. D. Chong, C. B. Liu, Y. Liang, B. Zhang, *Angew. Chem. Int. Ed.* **2018**, *57*, 13163.

- [9] F. H. Ma, S. H. Wang, L. Y. Han, Y. H. Guo, Z. Y. Wang, P. Wang, Y. Y. Liu, H. F. Cheng, Y. Dai, Z. K. Zheng, B. B. Huang, *ACS Appl. Mater. Interfaces* **2021**, *13*, 56140.
- [10] Z. T. Tu, X. Y. He, X. Liu, D. K. Xiong, J. Zuo, D. L. Wu, J. Y. Wang, Z. F. Chen, *Chin. J. Catal.* **2024**, *58*, 146.
- [11] K. L. Wei, X. Wang, X. L. Jiao, C. Li, D. R. Chen, *Appl. Surf. Sci.* **2022**, *578*, 152065.
- [12] Y. Wang, Y. Y. Xue, L. T. Yan, H. P. Li, Y. P. Li, E. H. Yuan, M. Li, S. N. Li, Q. G. Zhai, *ACS Appl. Mater. Interfaces* **2020**, *12*, 24786.
